# Supplementary material
Source: Springer Nature journal article supplement (https://www.springermedizin.de/resource/supplementary/12865_2009_287_MOESM3_ESM.pdf/9427742)

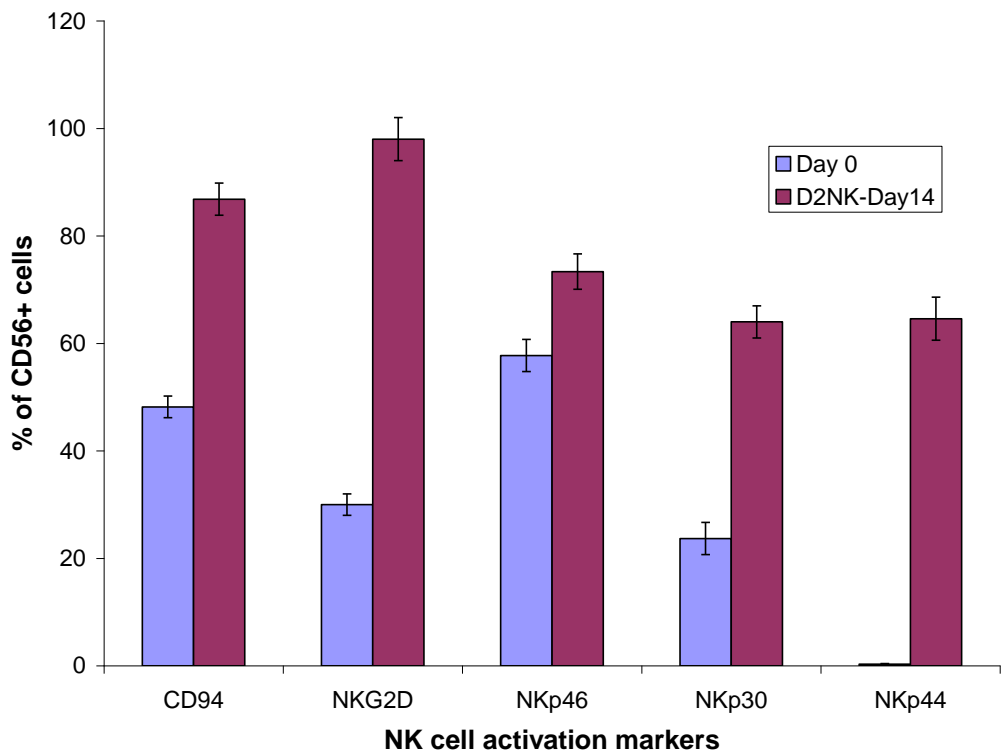

**a**

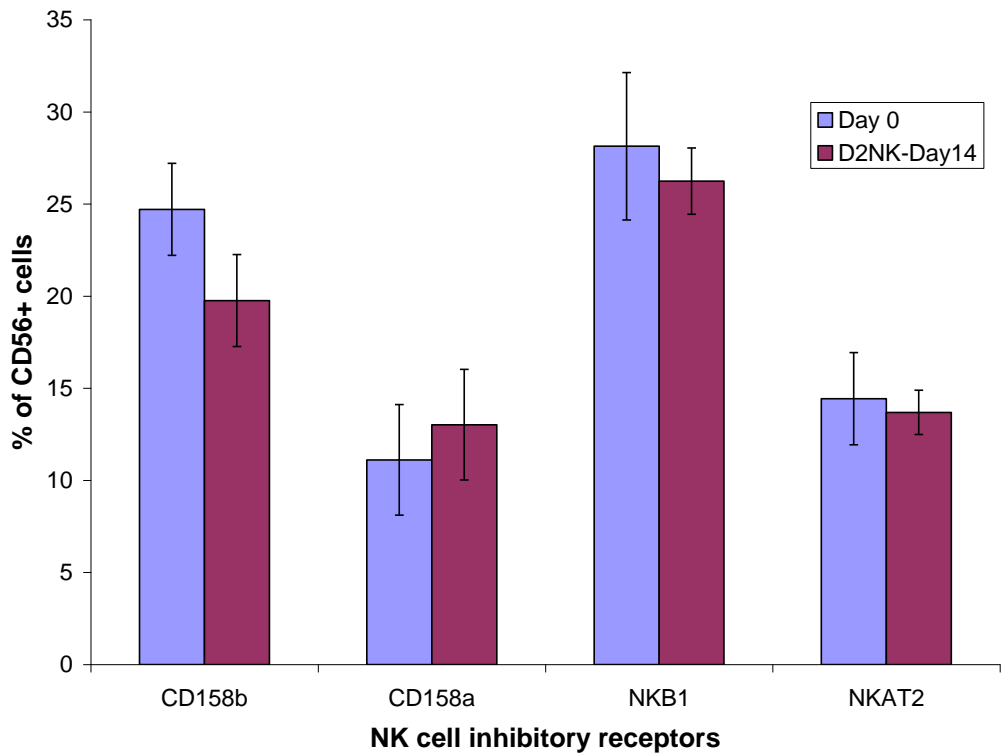

**b**

Supplement: MOESM3 [file 9427742]
